# Supplementary material for: Affinity adsorbents for proline-rich peptide sequences: a new role for WW domains
Source: Royal Society of Chemistry journal article supplement (doi:10.1039/c6ra10900d), 2016-01-01
Supplement: c6ra10900d1.pdf [file c6ra10900d1.pdf]

**Figure S2**

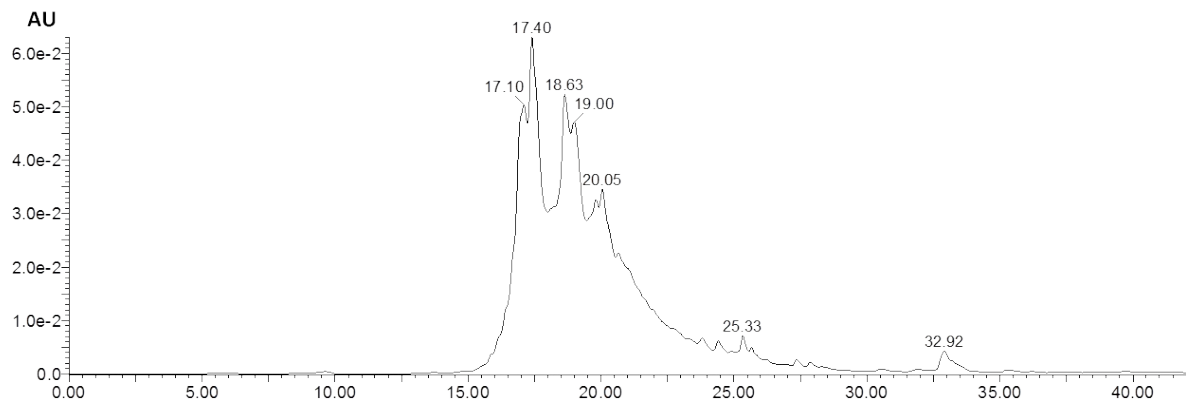

**Figure S2.** HPLC chromatogram of the hYAP65\_WWmutated standard method (linear gradient from 10% to 90% solvent B over 25min with a flow rate of 10ml/min (solvent A: water/TFA, 99.9:0.1 v/v) and solvent B: acetonitrile/water/TFA, 90:9.9:0.1 v/v)).

**Figure S3**

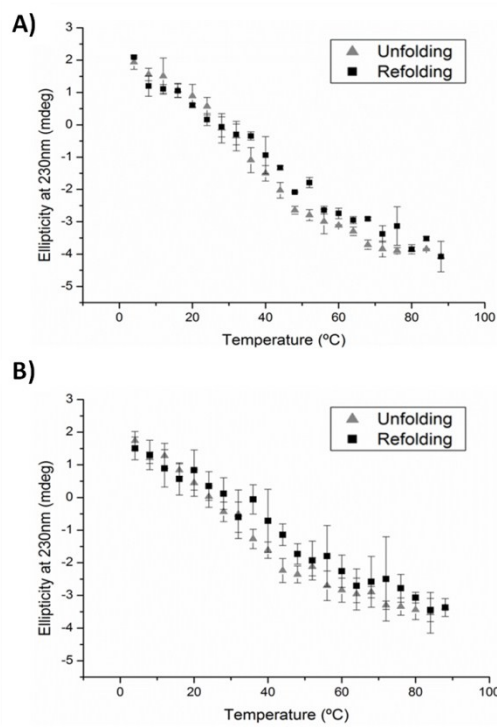

**Figure S3.** Circular Dichroism studies: unfolding and refolding curves between 4 and 88 °C. A) hYAP65\_WWmutated\_SCR and B) hYAP65\_WWmutated\_PP. The unfolding state is reversible for both peptides.
